# Supplementary material
Source: publisher figshare collection journal article supplement (https://gsajournals.figshare.com/ndownloader/files/24121472)
Supplement: Supplementary file 1 [file 24121472]

## Sheet: EGFR_human
DATABASE	ID	Description	GeneRatio	BgRatio	pvalue	p.adjust	qvalue	geneID	Count	CLUSTER
GI	GO:0035329	hippo signaling	4/46	38/16834	3.36472470420165e-06	0.0038694334098319	0.00313096488264659	MOB1B/STK3/FAT4/LATS1	4	Hippo signaling
KEGG	Hippo signaling pathway	Hippo signaling pathway	5/28	160/6124	0.000690663734794688	0.0428211515572706	0.0414398240876813	MOB1B/STK3/FAT4/LATS1/FRMD1	5	Hippo signaling
GO	GO:1903362	regulation of cellular protein catabolic process	5/46	237/16834	0.000453993379056057	0.107721680817932	0.0871633554627479	PARK7/PTEN/FAM192A/PRICKLE1/LATS1	5	Protein turnover
GO	GO:0050821	protein stabilization	4/46	164/16834	0.00103038129478022	0.107721680817932	0.0871633554627479	HSPD1/PARK7/PTEN/STK3	4	Protein turnover
GO	GO:0015850	organic hydroxy compound transport	4/46	239/16834	0.00405201439973771	0.172585798507347	0.139648371515327	PARK7/REN/SLC5A8/SLC5A12	4	Protein turnover
KEGG	Autophagy	Autophagy	4/28	128/6124	0.00252696686080287	0.0783359726848889	0.075809005824086	IGBP1/PRKACB/PTEN/CTSD	4	Protein turnover
PANTHER	Alzheimer disease-amyloid secretase pathway	Alzheimer disease-amyloid secretase pathway	5/17	214/5454	0.000373140421843722	0.0138061956082177	0.0109978229596044	CHRNA2/LATS1/NAPSA/CTSD/REN	5

## Sheet: YAP_human
DATABASE	ID	Description	GeneRatio	BgRatio	pvalue	p.adjust	qvalue	geneID	Count	CLUSTER
GO	GO:0007158	neuron cell-cell adhesion	6/561	16/16834	8.02960212075147e-06	0.00413223399139173	0.00390809187429733	NLGN4X/NLGN3/NLGN4Y/NLGN1/NINJ2/CEL	6	cell interaction
GO	GO:0071709,GO:0044091	membrane assembly,membrane biogenesis	7/561,7/561	29/16834,34/16834	3.6224396334255e-05,0.000108051207725809	0.012427986642344,0.0248152633275984	0.011753863336878,0.0234692249207487	PTEN/ANK3/NLGN4X/NLGN3/NLGN4Y/NLGN1/CEL	7,7	cell interaction
GO	GO:0006063	uronic acid metabolic process	10/561	24/16834	2.0085837662818e-09	4.13466968289108e-06	3.91039544814546e-06	AKR1A1/UGT2B17/UGT2B15/UGT2B7/UGT2A3/UGT1A3/UGT1A1/UGT2B28/UGT2B4/UGT2B11	10	General metabolism
GO	GO:0006805	xenobiotic metabolic process	13/561	114/16834	0.000108495200363559	0.0248152633275984	0.0234692249207487	EPHX1/PHGDH/ACY1/CES1/CES3/UGT2B15/UGT1A3/UGT1A1/UGT2B28/UGT2B11/CES2/CYP3A5/CYP3A4	13	General metabolism
KEGG	Ascorbate and aldarate metabolism	Ascorbate and aldarate metabolism	10/258	27/6124	6.62984155918707e-08	6.05649237649542e-06	5.7644522461444e-06	UGT2B10/UGT2B17/UGT2B15/UGT2B7/UGT2A3/UGT1A3/UGT1A1/UGT2B28/UGT2B4/UGT2B11	10	General metabolism
KEGG	Pentose and glucuronate interconversions	Pentose and glucuronate interconversions	11/258	34/6124	7.25328428322805e-08	6.05649237649542e-06	5.7644522461444e-06	UGT2B10/AKR1A1/UGT2B17/UGT2B15/UGT2B7/UGT2A3/UGT1A3/UGT1A1/UGT2B28/UGT2B4/UGT2B11	11	General metabolism
KEGG	Chemical carcinogenesis	Chemical carcinogenesis	16/258	82/6124	2.12193640416242e-07	1.18121126498375e-05	1.12425402466149e-05	EPHX1/GSTT2/UGT2B10/CYP3A7-CYP3A51P/UGT2B17/UGT2B15/UGT2B7/UGT2A3/UGT1A3/UGT1A1/UGT2B28/UGT2B4/UGT2B11/CYP3A5/CYP3A43/CYP3A4	16	General metabolism
KEGG	Porphyrin and chlorophyll metabolism	Porphyrin and chlorophyll metabolism	11/258	42/6124	8.03313716465046e-07	2.68306781299325e-05	2.55369202497309e-05	COX15/UGT2B10/UGT2B17/UGT2B15/UGT2B7/UGT2A3/UGT1A3/UGT1A1/UGT2B28/UGT2B4/UGT2B11	11	General metabolism
KEGG	Steroid hormone biosynthesis,Retinol metabolism	Steroid hormone biosynthesis,Retinol metabolism	13/258,13/258	59/6124,66/6124	6.95011059393696e-07,2.69508368329147e-06	2.68306781299325e-05,6.42969964442393e-05	2.55369202497309e-05,6.11966370190994e-05	UGT2B10/CYP3A7-CYP3A51P/UGT2B17/UGT2B15/UGT2B7/UGT2A3/UGT1A3/UGT1A1/UGT2B28/UGT2B4/UGT2B11/CYP3A5/CYP3A4	13,13	General metabolism
KEGG	Drug metabolism	Drug metabolism	17/258	109/6124	2.44592941341172e-06	6.42969964442393e-05	6.11966370190994e-05	UCKL1/UPP1/GSTT2/UGT2B10/CES1/UGT2B17/UGT2B15/UGT2B7/UGT2A3/UGT1A3/UGT1A1/UGT2B28/UGT2B4/UGT2B11/CES2/CYP3A5/CYP3A4	17	General metabolism
PANTHER	Nicotine degradation	Nicotine degradation	11/195	46/5454	4.10584145794226e-07	3.32573158093323e-05	2.98213747997912e-05	UGT2B10/UGT2B17/UGT2B15/UGT2B7/UGT2A3/UGT1A3/UGT1A1/UGT8/UGT2B28/UGT2B4/UGT2B11	11	General metabolism
REACTOME	R-HSA-156580	Phase II - Conjugation of compounds	16/372	109/10539	1.25267138090177e-06	0.000269073812617701	0.000257918444320407	AHCY/GGCT/GSS/GSTT2/UGT2B10/AKR1A1/UGT2B17/UGT2B15/UGT2B7/UGT2A3/UGT1A3/UGT1A1/UGT2B28/UGT2B4/UGT2B11/GLYATL3	16	General metabolism
REACTOME	R-HSA-156588	Glucuronidation	10/372	25/10539	5.42124123545437e-09	2.91120654343899e-06	2.79051259382862e-06	UGT2B10/UGT2B17/UGT2B15/UGT2B7/UGT2A3/UGT1A3/UGT1A1/UGT2B28/UGT2B4/UGT2B11	10	General metabolism
REACTOME	R-HSA-211859	Biological oxidations	28/372	222/10539	4.2058425104695e-09	2.91120654343899e-06	2.79051259382862e-06	AHCY/GGCT/EPHX1/PAOX/GSS/ACY1/GSTT2/UGT2B10/CYB5B/CYP3A7-CYP3A51P/CES1/CES3/AKR1A1/UGT2B17/UGT2B15/UGT2B7/UGT2A3/UGT1A3/UGT1A1/UGT2B28/UGT2B4/UGT2B11/CYP4V2/GLYATL3/CES2/CYP3A5/CYP3A43/CYP3A4	28	General metabolism
REACTOME	R-HSA-196854	Metabolism of vitamins and cofactors	17/372	189/10539	0.000372872086681154	0.0317480961798225	0.0304318710809237	MCCC1/PTS/SPR/IDH1/NADK/FASN/SLC25A32/NMNAT1/CYB5A/BTD/PLB1/NT5E/SDC2/SLC5A8/TTPA/LRP2/CALM1	17	General metabolism
MsigDB	HALLMARK_XENOBIOTIC_METABOLISM	HALLMARK_XENOBIOTIC_METABOLISM	15/174	200/4378	0.0124450668679763	0.30490413826542	0.294751583715229	AHCY/PTS/IDH1/ABCC3/EPHX1/ACOX1/GSS/ENPEP/CYB5A/UPP1/GSTT2/ACP2/TTPA/CES1/SPINT2	15	General metabolism
MsigDB	HALLMARK_OXIDATIVE_PHOSPHORYLATION	HALLMARK_OXIDATIVE_PHOSPHORYLATION	14/174	200/4378	0.0266689672497831	0.435593131746458	0.421088956575523	HSD17B10/COX6A1/AFG3L2/IDH1/VDAC2/COX15/NDUFS3/NDUFS8/CYB5A/SLC25A4/MRPS11/ATP6V0E1/GLUD1/ATP6AP1	14	General metabolism
MsigDB	HALLMARK_FATTY_ACID_METABOLISM	HALLMARK_FATTY_ACID_METABOLISM	11/174	157/4378	0.0465198110372933	0.569867685206843	0.550892499125842	HSD17B10/SUCLG2/PTS/IDH1/EPHX1/ACOX1/FASN/HPGD/NBN/CEL/SLC22A5	11	General metabolism
KEGG	Glutathione metabolism	Glutathione metabolism	7/258	54/6124	0.00705986723906886	0.130999758769389	0.124683035450222	IDH1/GGCT/GSS/LAP3/GSTT2/GPX7/ANPEP	7	General metabolism
KEGG	Biosynthesis of amino acids	Biosynthesis of amino acids	8/258	75/6124	0.0130559869185022	0.218034981538987	0.207521476283561	RPIA/IDH1/TKTL2/PSPH/PHGDH/CTH/ACO1/ACY1	8	General metabolism
MsigDB	HALLMARK_P53_PATHWAY	HALLMARK_P53_PATHWAY	15/174	199/4378	0.0119184392549351	0.30490413826542	0.294751583715229	MAPKAPK3/HINT1/EPHX1/RAP2B/BAIAP2/HEXIM1/UPP1/STOM/PCNA/PPM1D/IFI30/TP63/CTSD/TGFB1/SP1	15	Growth signaling
PANTHER	p53 pathway by glucose deprivation	p53 pathway by glucose deprivation	10/195	133/5454	0.020131378897602	0.285704491853843	0.256187263650619	RRAS2/RAP2B/TSC1/LATS1/RASL11A/SIK2/TP73/TP63/RASD1/RERG	10	Growth signaling
PANTHER	Notch signaling pathway	Notch signaling pathway	8/195	100/5454	0.0259667453057142	0.285704491853843	0.256187263650619	ADAM17/NEURL1B/GULP1/BRD3/BRD4/BRDT/BRD2/HELT	8	Growth signaling
NCI	LKB1 signaling events	LKB1 signaling events	4/93	34/2396	0.0404827834185719	0.858005854136226	0.858005854136226	TSC1/GSK3B/SIK2/CTSD	4	Growth signaling
REACTOME	R-HSA-8854214	TBC/RABGAPs	8/372	46/10539	0.000179885780919598	0.027599618386807	0.0264553825171981	ARF6/TBC1D13/RAB6A/RABGAP1/TSC1/TBC1D15/RABEP1/GABARAP	8	Growth signaling
KEGG	Renin-angiotensin system	Renin-angiotensin system	4/258	23/6124	0.014476113586791	0.21977372445401	0.209176378144062	ENPEP/REN/MME/ANPEP	4	protein folding
REACTOME	R-HSA-2022377	Metabolism of Angiotensinogen to Angiotensins	5/372	17/10539	0.000232322067609827	0.0290920891656911	0.0278859778536175	ENPEP/CTSD/REN/MME/ANPEP	5	protein folding
PANTHER	Ionotropic glutamate receptor pathway	Ionotropic glutamate receptor pathway	12/195	116/5454	0.000817473810223304	0.0331076893140438	0.02968720679232	ARFIP2/SNAP25/STX8/SLC17A6/SLC1A2/CACNA1B/SLC1A3/SLC17A1/SLC17A3/SLC17A4/SLC17A5/SLC17A2	12	signaling pathway
PANTHER	Metabotropic glutamate receptor group III pathway	Metabotropic glutamate receptor group III pathway	13/195	149/5454	0.00242893715141378	0.065581303088172	0.058805846823702	SNAP25/PRKACB/GNB1/STX8/SLC17A6/SLC1A2/CACNA1B/SLC1A3/SLC17A1/SLC17A3/SLC17A4/SLC17A5/SLC17A2	13	signaling pathway
PANTHER	Muscarinic acetylcholine receptor 1 and 3 signaling pathway	Muscarinic acetylcholine receptor 1 and 3 signaling pathway	12/195	190/5454	0.0386804562194945	0.285704491853843	0.256187263650619	SNAP25/PLCG1/GNB1/CHRM1/STX8/LATS1/KCNB1/CES4A/CES5A/CES1/CES3/CES2	12	signaling pathway
PANTHER	Muscarinic acetylcholine receptor 2 and 4 signaling pathway	Muscarinic acetylcholine receptor 2 and 4 signaling pathway	10/195	145/5454	0.0341008603795623	0.285704491853843	0.256187263650619	SNAP25/PRKACB/GNB1/CHRM1/STX8/CES4A/CES5A/CES1/CES3/CES2	10	signaling pathway
NCI	p73 transcription factor network	p73 transcription factor network	8/93	77/2396	0.00882374662611398	0.858005854136226	0.858005854136226	PRKACB/FASN/ITCH/HSF1/UBE4B/TP73/TP63/SP1	8	signaling pathway
NCI	Endogenous TLR signaling	Endogenous TLR signaling	4/93	25/2396	0.014387671179134	0.858005854136226	0.858005854136226	TLR1/TLR2/TLR6/TLR4	4	signaling pathway
BIOCARTA	toll-like receptor pathway	toll-like receptor pathway	4/43	33/1028	0.0448554280287973	0.717379143458064	0.717379143458064	TRAF6/TLR2/TLR6/TLR4	4	signaling pathway
NCI	BARD1 signaling events	BARD1 signaling events	4/93	28/2396	0.0213143840141871	0.858005854136226	0.858005854136226	NBN/FANCD2/PCNA/UBE2L3	4	signaling pathway
NCI	N-cadherin signaling events	N-cadherin signaling events	4/93	32/2396	0.0332829759049105	0.858005854136226	0.858005854136226	PLCG1/PTPN11/PTPN1/CALM1	4	signaling pathway
BIOCARTA	signaling pathway from g-protein families	signaling pathway from g-protein families	4/43	22/1028	0.0112111296540087	0.717379143458064	0.717379143458064	PRKACB/PLCG1/GNB1/CREB1	4	signaling pathway
NCI	Regulation of Telomerase	Regulation of Telomerase	6/93	68/2396	0.0459222466511024	0.858005854136226	0.858005854136226	NBN/NR2F2/PINX1/TGFB1/WRN/SP1	6	signaling pathway
GO	GO:0006814	sodium ion transport	24/561	214/16834	2.10355782560973e-07	0.000205800379177634	0.00019463728125438	SLC9A6/SLC8B1/SLC9A8/SLC17A6/KLHL3/STOM/ANK3/SLC5A8/SLC5A12/SLC5A5/ASIC4/TGFB1/SLC17A1/SLC17A3/SLC17A4/ASIC1/ATP4A/ATP12A/SLC22A5/SLC22A4/SLC17A2/ASIC5/ASIC3/ASIC2	24	Transmembrane transport
GO	GO:1901264	carbohydrate derivative transport	11/561	70/16834	1.8570407497404e-05	0.00764543676668121	0.00723073024556813	RALBP1/SLC25A4/SLC25A17/VLDLR/NPC2/SLC17A1/SLC17A3/SLC17A4/SCARB1/SLC17A5/SLC17A2	11	Transmembrane transport
GO	GO:0006855	drug transmembrane transport	11/561	87/16834	0.000144272343187861	0.0312615387844434	0.029565839194011	RALBP1/SLC25A32/SLC17A6/SLC1A2/SLC25A22/TMEM30A/SLC1A3/SLC36A4/SLC17A3/LRP2/SLC22A5	11	Transmembrane transport
GO	GO:0015893	drug transport	20/561	217/16834	4.05574873732876e-05	0.0128442442704481	0.0121475421695377	RALBP1/SLC25A32/SLC25A4/PTPN11/SLC17A6/SLC25A17/SLC1A2/SLC25A22/TMEM30A/SLC1A3/CHRNA6/SLC5A8/SLC36A4/SLC36A2/SLC36A3/SLC36A1/SLC17A3/FZD4/LRP2/SLC22A5	20	Transmembrane transport
GO	GO:1903825	organic acid transmembrane transport	14/561	128/16834	9.41368477412975e-05	0.0242225876344326	0.0229086973549381	MPC2/SLC7A9/SLC25A32/SLC17A6/SLC1A2/SLC25A22/SLC1A3/SLC5A8/SLC5A12/SLC36A4/SLC36A2/SLC36A3/SLC36A1/LRP2	14	Transmembrane transport
REACTOME	R-HSA-425393	Transport of inorganic cations/anions and amino acids/oligopeptides	18/372	108/10539	3.65129010003009e-08	1.30716185581077e-05	1.2529690237998e-05	SLC9A6/SLC8B1/SLC7A9/SLC9A8/SLC17A6/SLC1A2/SLC25A22/SLC15A1/SLC1A3/SLC5A8/SLC5A12/SLC5A5/SLC36A4/SLC36A2/SLC36A1/SLC17A1/CALM1/SLC17A5	18	Transmembrane transport
REACTOME	R-HSA-425407	SLC-mediated transmembrane transport	22/372	246/10539	5.79329330468513e-05	0.0103699950153864	0.00994007167014395	SLC9A6/SLC8B1/SLC7A9/SLC9A8/SLC17A6/SLC1A2/SLC25A22/SLC15A1/SLC30A2/SLC1A3/SLC5A8/SLC5A12/SLC5A5/SLC36A4/SLC36A2/SLC36A1/SLC17A1/APOD/CALM1/SLC22A5/SLC22A4/SLC17A5	22	Transmembrane transport
REACTOME	R-HSA-428643	Organic anion transporters	6/372	10/10539	3.46113473321317e-07	9.29314675867735e-05	8.90786781337494e-05	SLC17A6/SLC25A22/SLC5A8/SLC5A5/SLC17A1/SLC17A5	6	Transmembrane transport
REACTOME	R-HSA-168799	Neurotoxicity of clostridium toxins	4/372	10/10539	0.000270876062995262	0.0290920891656911	0.0278859778536175	SNAP25/SV2C/SV2A/SV2B	4
GO	GO:0003341	cilium movement	9/561	62/16834	0.000199673132022487	0.0411027142268289	0.0388732060711146	DRC1/TTLL1/RSPH4A/DNAH3/DNAI2/CFAP61/LRRC6/WDR78/TEKT4	9
KEGG	Lysosome	Lysosome	13/258	123/6124	0.00189459966080878	0.0395497679193832	0.0376427037871217	NAGLU/MFSD8/SGSH/GNPTAB/CD63/ATP6V0A4/ACP2/CTSE/CTSD/NAPSA/NPC2/ATP6AP1/SLC17A5	13

## Sheet: SOCS_human
DATABASE	ID	Description	GeneRatio	BgRatio	pvalue	p.adjust	qvalue	geneID	Count	CLUSTER
GO	GO:0046834,GO:0043491,GO:0046488	lipid phosphorylation,protein kinase B signaling,phosphatidylinositol metabolic process	4/32,4/32,4/32	122/16834,227/16834,230/16834	8.07000815815179e-05,0.000860830370745471,0.000903951234847051	0.00203991872886615,0.0135061316789376,0.0137099270618469	0.00152669452582579,0.0101081170575739,0.0102606394551937	GRB2/ERBB4/EGFR/PIK3R3	4,4,4	Growth signaling
KEGG	ErbB signaling pathway	ErbB signaling pathway	5/22	85/6124	1.00083549447462e-05	0.000730609910966474	0.000505685302471388	GRB2/ERBB4/EGFR/PIK3R3/STAT5B	5	Growth signaling
KEGG	Proteoglycans in cancer	Proteoglycans in cancer	5/22	198/6124	0.000564503529054597	0.0137362525403285	0.00950742785776164	GRB2/RPS6/ERBB4/EGFR/PIK3R3	5	Growth signaling
KEGG	JAK-STAT signaling pathway	JAK-STAT signaling pathway	4/22	162/6124	0.0023784106272769	0.0289373292985357	0.0200287210718055	GRB2/EGFR/PIK3R3/STAT5B	4	Growth signaling
REACTOME	R-HSA-2219530,R-HSA-2219528,R-HSA-6811558,R-HSA-199418	Constitutive Signaling by Aberrant PI3K in Cancer,PI3K/AKT Signaling in Cancer,PI5P, PP2A and IER3 Regulate PI3K/AKT Signaling,Negative regulation of the PI3K/AKT network	4/31,4/31,4/31,4/31	71/10539,97/10539,99/10539,106/10539	5.18664709178359e-05,0.000175350937840837,0.000189730330513742,0.000246811056070147	0.000827868670419305,0.00227045729641744,0.00231582609303538,0.00262632277613105	0.000388473567603225,0.0010654016482872,0.00108669074752453,0.00123238988860937	GRB2/ERBB4/EGFR/PIK3R3	4,4,4,4	Growth signaling
REACTOME	R-HSA-5673001	RAF/MAP kinase cascade	5/31	248/10539	0.000713637019267601	0.00493598938326757	0.00231619032569309	PSMD6/PSMB4/GRB2/ERBB4/EGFR	5	Growth signaling
PANTHER	Insulin/IGF pathway-protein kinase B signaling cascade	Insulin/IGF pathway-protein kinase B signaling cascade	4/13	216/5454	0.00129017784884352	0.0167723120349658	0.00950657362305753	CDK9/ERBB4/EGFR/PIK3R3	4	Growth signaling
KEGG	Spliceosome	Spliceosome	4/22	133/6124	0.00114781789042824	0.0209476765003154	0.0144987523001462	PLRG1/WBP11/SNRPD3/SF3B4	4	mRNA splicing
REACTOME	R-HSA-72163,R-HSA-72172,R-HSA-72203	mRNA Splicing - Major Pathway,mRNA Splicing,Processing of Capped Intron-Containing Pre-mRNA	4/31,4/31,4/31	183/10539,191/10539,243/10539	0.00191842009156903,0.00224265193823446,0.00531845425711796	0.00955258639702801,0.0105761426632648,0.0200650774245814	0.00448250725034922,0.00496280632264802,0.00941544533556768	PLRG1/WBP11/SNRPD3/SF3B4	4,4,4	mRNA splicing
GO	GO:2001252	positive regulation of chromosome organization	5/32	165/16834	1.3839896328985e-05	0.000524762735807347	0.000392737408984793	RUVBL2/CCT3/CCT8/CDK9/CCT4	5	Protein folding
GO	GO:1904872,GO:0090670,GO:0090671,GO:0090672,GO:0090685,GO:0070199,GO:0034502,GO:0006403	regulation of telomerase RNA localization to Cajal body,RNA localization to Cajal body,telomerase RNA localization to Cajal body,telomerase RNA localization,RNA localization to nucleus,establishment of protein localization to chromosome,protein localization to chromosome,RNA localization	4/32,4/32,4/32,4/32,4/32,4/32,4/32,4/32	18/16834,19/16834,19/16834,19/16834,19/16834,25/16834,81/16834,229/16834	3.22894327556166e-08,4.08455168189636e-08,4.08455168189636e-08,4.08455168189636e-08,4.08455168189636e-08,1.32245547533147e-07,1.61434159985788e-05,0.000889411733748487	4.58599537289162e-06,4.58599537289162e-06,4.58599537289162e-06,4.58599537289162e-06,4.58599537289162e-06,1.09403134777422e-05,0.000587620342348267,0.0137099270618469	3.43220243639199e-06,3.43220243639199e-06,3.43220243639199e-06,3.43220243639199e-06,3.43220243639199e-06,8.18783437836806e-06,0.00043978063794023,0.0102606394551937	RUVBL2/CCT3/CCT8/CCT4	4,4,4,4,4,4,4,4	Protein folding
MsigDB	HALLMARK_MYC_TARGETS_V1	HALLMARK_MYC_TARGETS_V1	7/16	200/4378	3.01273843884028e-06	6.02547687768056e-05	5.70834651569737e-05	RUVBL2/CCT3/CUL1/SNRPD3/RPS6/CCT4/RPL34	7	Protein folding
REACTOME	R-HSA-5620920,R-HSA-5617833	Cargo trafficking to the periciliary membrane,Cilium Assembly	4/31,4/31	51/10539,199/10539	1.38985193695544e-05,0.00260304676560022	0.000411991824168935,0.0117420044317836	0.000193325269426133,0.00550988159766638	ARF4/CCT3/CCT8/CCT4	4,4	Protein folding
GO	GO:0072599,GO:0070972	establishment of protein localization to endoplasmic reticulum,protein localization to endoplasmic reticulum	6/32,6/32	111/16834,136/16834	5.65239963061067e-08,1.89768147749782e-07	5.14368366385571e-06,1.43907512043585e-05	3.84958164316327e-06,1.07701747012376e-05	SEC61B/RPL21/RPL10A/RPS6/RPL39/RPL34	6,6	Protein synthesis and targeting
KEGG	Ribosome	Ribosome	5/22	134/6124	9.08531053830292e-05	0.00331613834648057	0.00229523634651863	RPL21/RPL10A/RPS6/RPL39/RPL34	5	Protein synthesis and targeting
REACTOME	R-HSA-1799339	SRP-dependent cotranslational protein targeting to membrane	6/31	112/10539	7.46597222009789e-07	0.000154918923567031	7.26949926693742e-05	SEC61B/RPL21/RPL10A/RPS6/RPL39/RPL34	6	Protein synthesis and targeting
REACTOME	R-HSA-9010553,R-HSA-376176	Regulation of expression of SLITs and ROBOs,Signaling by ROBO receptors	7/31,7/31	171/10539,218/10539	4.95842396122727e-07,2.53628692949797e-06	0.000154918923567031,0.000282951089432714	7.26949926693742e-05,0.000132773497894869	PSMD6/PSMB4/RPL21/RPL10A/RPS6/RPL39/RPL34	7,7	Protein synthesis and targeting
REACTOME	R-HSA-156902,R-HSA-192823,R-HSA-156842,R-HSA-2408557,R-HSA-72764,R-HSA-975956,R-HSA-72689,R-HSA-156827,R-HSA-72706,R-HSA-927802,R-HSA-975957,R-HSA-2408522,R-HSA-72613,R-HSA-72737,R-HSA-168273,R-HSA-168255,R-HSA-168254,R-HSA-6791226,R-HSA-8868773,R-HSA-72312	Peptide chain elongation,Viral mRNA Translation,Eukaryotic Translation Elongation,Selenocysteine synthesis,Eukaryotic Translation Termination,Nonsense Mediated Decay (NMD) independent of the Exon Junction Complex (EJC),Formation of a pool of free 40S subunits,L13a-mediated translational silencing of Ceruloplasmin expression,GTP hydrolysis and joining of the 60S ribosomal subunit,Nonsense-Mediated…	5/31,5/31,5/31,5/31,5/31,5/31,5/31,5/31,5/31,5/31,5/31,5/31,5/31,5/31,5/31,5/31,5/31,5/31,5/31,5/31	89/10539,89/10539,93/10539,93/10539,93/10539,95/10539,101/10539,111/10539,112/10539,115/10539,115/10539,118/10539,119/10539,119/10539,133/10539,143/10539,154/10539,184/10539,194/10539,204/10539	5.47982848303212e-06,5.47982848303212e-06,6.80485979961221e-06,6.80485979961221e-06,6.80485979961221e-06,7.55520828575429e-06,1.02014459828914e-05,1.6169500520584e-05,1.68901969364052e-05,1.9203677423996e-05,1.9203677423996e-05,2.17571577281643e-05,2.2664597930595e-05,2.2664597930595e-05,3.87487843311404e-05,5.48338657869674e-05,7.80409457757921e-05,0.000180542387425965,0.000231079783340399,0.000…	0.000313541143858803,0.000313541143858803,0.000313541143858803,0.000313541143858803,0.000313541143858803,0.000313541143858803,0.000384872734809086,0.00043808948303801,0.00043808948303801,0.000442751451719908,0.000442751451719908,0.000447895625771283,0.000447895625771283,0.000447895625771283,0.00065104776247625,0.00084281682598487,0.00111679284472254,0.00227045729641744,0.00260103497552266,0.00281…	0.000147127740301531,0.000147127740301531,0.000147127740301531,0.000147127740301531,0.000147127740301531,0.000147127740301531,0.000180599761419609,0.000205571475870721,0.000205571475870721,0.000207759083242062,0.000207759083242062,0.00021017296326617,0.00021017296326617,0.00021017296326617,0.000305501169456198,0.000395487920880662,0.000524049908113305,0.0010654016482872,0.00122052370443042,0.0013…	RPL21/RPL10A/RPS6/RPL39/RPL34	5,5,5,5,5,5,5,5,5,5,5,5,5,5,5,5,5,5,5,5	Protein synthesis and targeting
GO	GO:0050821	protein stabilization	4/32	164/16834	0.000252409593230911	0.00521824151756509	0.00390538144807937	CCT3/CCT8/CCT4/ATP1B1	4	Protein synthesis and targeting
REACTOME	R-HSA-983705,R-HSA-2454202	Signaling by the B Cell Receptor (BCR),Fc epsilon receptor (FCERI) signaling	4/31,4/31	112/10539,134/10539	0.000304801000484804,0.000602381700630006	0.00281094256002653,0.00480746934156639	0.00131902187344301,0.00225588288697472	PSMD6/PSMB4/GRB2/CUL1	4,4	Protein synthesis and targeting
REACTOME	R-HSA-157118	Signaling by NOTCH	4/31	235/10539	0.00472466055465535	0.0186736583826854	0.00876252834697985	PSMD6/PSMB4/CUL1/EGFR	4	Protein synthesis and targeting

## Sheet: database_criteria
DATABASE	NAME	Web page	NOTE	Source of annotation data	Format of annot. data	Name of function	Algorithm	Min. Nr.	Max. Nr.	P.value criteria	Min. nr. of enriched genes	Min. nr. of genes annot. to database
NCI	Pathway Interaction Database (PID)		Discontinued	Graphite package	NA	enricher	Universal enrichment analyzer	5	250	<0.05	>3	>10
GO	Gene Ontology	http://www.geneontology.org/	Biological processes;	"clusterProfiler" package	NA	enrichGO	GO Enrichment Analysis of a gene set	10	250	<0.05	>3	>10
REACTOME	Reactome Pathway Database	https://reactome.org/		"ReactomePA" package	NA	enrichPathway	Reactome Pathway Enrichment Analysis of a gene set	5	250	<0.05	>3	>10
MsigDb	Hallmark gene sets	http://software.broadinstitute.org/gsea/msigdb	h.all.v6.2.entrez	ONLINE	NA	enricher	Universal enrichment analyzer	5	250	<0.05	>3	>10
PANTHER	PANTHER (Protein ANalysis THrough Evolutionary Relationships) Classification System	http://www.pantherdb.org/	Human	ONLINE	biopax	enricher	Universal enrichment analyzer	5	250	<0.05	>3	>10
KEGG	Kyoto Encyclopedia of Genes and Genomes	https://www.genome.jp/kegg/	Human	ONLINE		enricher	Universal enrichment analyzer	5	250	<0.05	>3	>10
